# Supplementary material for: Nutrient Estimation from 24-Hour Food Recalls Using Machine Learning and Database Mapping: A Case Study with Lactose
Source: MDPI journal article supplement (doi:10.3390/nu11123045), 2019-12-13
Supplement: s1 [file s1]

## Supplemental Material for

### Nutrient estimation from 24-hour food recalls using machine learning and database mapping: a case study with lactose

Table S1. Examples of the ASA24 Food Name (FoodListTerm) and responses to ASA24 prompts, the corresponding ASA24 FoodCode and Food Description, and the output of the manual lookup into NDSR when searching the Food Name

Figure S1. Creation of NDSR User Recipes with embedded recipes

Figure S2. Creation of NDSR User Recipes for a “Not Further Specified” (NFS) food

Table S2. Confidence ratings for the seven nutrients used to compare an ASA24 query to an NDSR match

Table S3. Examples of foods reported in ASA24 and the corresponding food from the manual lookup which are considered “high-confidence” and “low-confidence” matches

Figure S3. Principal Component Analysis (PCA) and t-Stochastic Neighbor Embedding (t-SNE) plots of the training foods

Table S4. The ASA24 FoodCode, Food Description, and ASA24 year for the five foods removed as outliers

Table S5. Performance metrics of the naïve baseline machine learning models

Table S6. Evaluation metrics for the machine learning models for the “high-confidence” test foods (n = 152)

Figure S4. Plots of the machine learning test results with and without “Salmon, raw”

Figure S5. Plots of the database matching training data results with and without outlier foods

Table S8. Evaluation parameters comparing the lactose from the manual lookup and the database-matching results for “high-confidence” foods

Table S10. The number of training and test foods correctly matched with the known FNDDS FoodLink for the database matching methods

Table S11. The number of lactose-free (0 g of lactose) ASA24-reported foods and the number of lactose-free Nutrient-Only and Nutrient + Text first matches

Tables S7 and S9 are supplied as separate files

**Table S1.** Examples of the ASA24 Food Name (FoodListTerm) and responses to ASA24 prompts, the corresponding ASA24 FoodCode and Food Description, and the output of the manual lookup into NDSR when searching the Food Name.

| From <i>MS</i> or <i>Responses</i> files |                             | From <i>INFMYPEI</i> or <i>Items</i> files |                                                   | From manual lookup                                                                                            |
|------------------------------------------|-----------------------------|--------------------------------------------|---------------------------------------------------|---------------------------------------------------------------------------------------------------------------|
| Variable                                 | Response                    | FoodCode                                   | ASA24 Food Description                            | NDSR Description                                                                                              |
| FoodListTerm                             | Yogurt (not frozen)         | 11411300                                   | Yogurt, plain, nonfat milk                        | yogurt, plain, nonfat (<1% fat)                                                                               |
| YogurtTypeMilk                           | Nonfat                      |                                            |                                                   |                                                                                                               |
| YogurtLoCalSwtmr                         | No                          |                                            |                                                   |                                                                                                               |
| YogurtFlav                               | Fruit variety (all flavors) |                                            |                                                   |                                                                                                               |
| YogurtUnitContainer                      | Cups                        |                                            |                                                   |                                                                                                               |
| YogurtPortionCup                         | 1/2 cup                     |                                            |                                                   |                                                                                                               |
| AnythingAdded                            | No                          |                                            |                                                   |                                                                                                               |
| FoodListTerm                             | Sour cream                  | 12310350                                   | Sour cream, light                                 | Sour cream, lowfat                                                                                            |
| SourCreamKind                            | Light                       |                                            |                                                   |                                                                                                               |
| SourCreamPortionSpoon                    | 2 tablespoons               |                                            |                                                   |                                                                                                               |
| FoodListTerm                             | Pizza                       | 58106500                                   | Pizza with meat, prepared from frozen, thin crust | pizza, frozen, with meat (e.g. sausage, pepperoni, or hamburger), thin crust, unknown if white or wheat crust |
| PizzaSource                              | Yes                         |                                            |                                                   |                                                                                                               |
| PizzaKind                                | Other- pepperoni cheese     |                                            |                                                   |                                                                                                               |
| PizzaCrust                               | Thin                        |                                            |                                                   |                                                                                                               |
| PizzaSize                                | Large                       |                                            |                                                   |                                                                                                               |
| PizzaPortionPiece                        | More than 1 piece           |                                            |                                                   |                                                                                                               |
| FoodListTerm                             | McDonald's Cheeseburger     | 27510310                                   | Cheeseburger with tomato and/or catsup, on bun    | McDonald's, lunch and dinner orders, cheeseburger                                                             |
| BurgerPortionSandwich                    | 1 sandwich                  |                                            |                                                   |                                                                                                               |

a

| From <i>MS</i> or <i>Responses</i> files |                  | From <i>INFMYPEI</i> or <i>Items</i> files |                                            |
|------------------------------------------|------------------|--------------------------------------------|--------------------------------------------|
| Variable                                 | Response         | FoodCode                                   | ASA24 Food Description                     |
| FoodListTerm                             | Eggs             | 32130010                                   | Egg omelet or scrambled egg, made with oil |
| EggPrep                                  | Scrambled        |                                            |                                            |
| EggIngAdd                                | Yes              |                                            |                                            |
| EggOmeletCheese                          | No               |                                            |                                            |
| EggOmeletMeat                            | No               |                                            |                                            |
| EggOmeletVegetables                      | No vegetables    |                                            |                                            |
| EggFatPrep2                              | Other fat or oil |                                            |                                            |
| EggUnit                                  | Number of eggs   |                                            |                                            |
| EggSize                                  | Large            |                                            |                                            |
| EggPortionNumber                         | More than 1 egg  |                                            |                                            |

b

| FoodCode | SR code  | SR description         | Amount | Measure | Weight |
|----------|----------|------------------------|--------|---------|--------|
| 32130010 | 1123     | Egg, whole, raw, fresh | 2      |         | 100    |
| 32130010 | 11100000 | Milk, NFS              | 2      | TB      | 30.5   |
| 32130010 | 2047     | Salt, table            | 0.125  | TS      | 0.75   |
| 32130010 | 82101000 | Vegetable oil, NFS     | 1.5    | TS      | 6.813  |

c

1. Egg omlet or scrambled egg, made with oil  
 ASA24 2016 - 32130010  
 1 servings made (serving = 100.0 grams)  
 Components/Ingredients:  
 1.i1 eggs, whole, raw  
 72.43070 G (1.45 large)  
 1.i2 Milk NFS ASA24 2016 - 11100000 (Milk NFS2)  
 0.2209136 servings eaten (serving = 100.0 grams)  
 1.i3 salt, regular  
 0.54323 G (0.09 TS)  
 1.i4 Vegetable oil, NFS ASA24 2016 - 82101000 (Veg oil NFS2)  
 0.0493470 servings eaten (serving = 100.0 grams)

**Figure S1.** Creation of NDSR User Recipes with embedded recipes. a) The ASA24 Food Name and Food Descriptions were retrieved from subject *MS* (ASA24-2014) or *Responses* (ASA24-2016) files. Note: Certain ASA24 Food Descriptions contain multiple foods. b) The corresponding FNDDS recipe for FoodCode 32130010 retrieved from the USDA Food Composition Standard Reference database (SR). Note: Each 8-digit SR Code in the recipe refers to additional recipes. c) NDSR User Recipes were created following the ingredient list, additional recipes, and amounts shown in b).

a)

| From <i>MS</i> or <i>Response</i> files |                     | From <i>INFMYPHEI</i> or <i>Items</i> files |                        |
|-----------------------------------------|---------------------|---------------------------------------------|------------------------|
| Variable                                | Response            | FoodCode                                    | ASA24 Food Description |
| FoodListTerm                            | Milk (unknown type) | 11100000                                    | Milk, NFS              |
| MilkPortionAddition                     | 1/4 cup             |                                             |                        |

b)

| Food code | SR code | SR description                                                             | Amount | Measure |
|-----------|---------|----------------------------------------------------------------------------|--------|---------|
| 11100000  | 1077    | Milk, whole, 3.25% milkfat, with added vitamin D                           | 31     | GM      |
| 11100000  | 1079    | Milk, reduced fat, fluid, 2% milkfat, with added vitamin A and vitamin D   | 38     | GM      |
| 11100000  | 1082    | Milk, lowfat, fluid, 1% milkfat, with added vitamin A and vitamin D        | 14     | GM      |
| 11100000  | 1085    | Milk, nonfat, fluid, with added vitamin A and vitamin D (fat free or skim) | 17     | GM      |

c)

|                                                                                                                                                                                                                                                                                                                                                       |
|-------------------------------------------------------------------------------------------------------------------------------------------------------------------------------------------------------------------------------------------------------------------------------------------------------------------------------------------------------|
| <p>1. Milk NFS ASA24 2016-11100000<br/> 1 servings made (serving = 100.0 grams)<br/> Components/Ingredients:<br/> 1.i1 milk, whole (3.5 - 4% fat)<br/> 31 G (0.13 CP)<br/> 1.i2 milk, 2% fat or reduced fat<br/> 38 G (0.16 CP)<br/> 1.i3 milk, 1% fat or lowfat<br/> 14 G (0.06 CP)<br/> 1.i4 milk, skim, nonfat or fat free<br/> 17 G (0.07 CP)</p> |
|-------------------------------------------------------------------------------------------------------------------------------------------------------------------------------------------------------------------------------------------------------------------------------------------------------------------------------------------------------|

**Figure S2.** Creation of NDSR User Recipes for an NFS food. a) The ASA24 Food Name and Food Descriptions. This Food Description stated, “Not Further Specified” (NFS) since the food was of “unknown type” b) The corresponding FNDDS recipe for FoodCode 11100000 was retrieved from the USDA Food Composition Standard Reference database (SR). Note: Food descriptions with “NFS” are often a mix various types of the same food in one recipe. c) The NDSR User Recipe output. The ingredient list and amount were guided by b).

**Table S2.** Confidence ratings for the seven nutrients used to compare an ASA24 query to an NDSR match

| <b>Nutrient</b>    | <b>Low</b> | <b>Medium<sup>1</sup></b> | <b>High</b> |
|--------------------|------------|---------------------------|-------------|
| kcal               | $\geq 128$ | 85 - 128                  | $\leq 85$   |
| Total Protein      | $\geq 10$  | 5 - 10                    | $\leq 5$    |
| Total Fat          | $\geq 3$   | 2.5 - 3                   | $\leq 2.5$  |
| Total Carbohydrate | $\geq 20$  | 10 - 20                   | $\leq 10$   |
| Calcium            | $\geq 200$ | 100 - 200                 | $\leq 100$  |
| Phosphorous        | $\geq 200$ | 100 - 200                 | $\leq 100$  |
| Sodium             | $\geq 200$ | 100 - 200                 | $\leq 100$  |

The values represent the absolute difference between the two foods. A “low” confidence meant large nutrient value difference above the cut off, “medium” confidence meant nutrient value difference fell between the given range, and a “high” confidence level meant a small nutrient value difference that was below the cut off.

<sup>1</sup>Ranges are non-inclusive

**Table S3.** Examples of foods reported in ASA24 and the corresponding food from the manual lookup that are considered “high confidence”<sup>1</sup> and “low confidence” matches.

| ASA24 FoodCode           | ASA24 Food Description                                                      | NDSR Food Description                                                                                                                                               | Food Description Confidence Level | Nutrient Confidence Level |
|--------------------------|-----------------------------------------------------------------------------|---------------------------------------------------------------------------------------------------------------------------------------------------------------------|-----------------------------------|---------------------------|
| High-Confidence Examples |                                                                             |                                                                                                                                                                     |                                   |                           |
| 11112110                 | Milk, cow's, fluid, 2% fat                                                  | milk, 2% fat or reduced fat                                                                                                                                         | H                                 | 7                         |
| 14104100                 | Cheese, Cheddar                                                             | Cheddar cheese, unknown type                                                                                                                                        | H                                 | 7                         |
| 11111000                 | Milk, cow's, fluid, whole                                                   | milk, whole (3.5 - 4% fat)                                                                                                                                          | H                                 | 7                         |
| 11531000                 | Eggnog, made with whole milk                                                | eggnog, regular                                                                                                                                                     | H                                 | 5                         |
| 53347000                 | Pie, pumpkin                                                                | pies, pumpkin                                                                                                                                                       | H                                 | 6                         |
| 58100800                 | Enchilada, just cheese, meatless, no beans, red-chile or enchilada sauce    | enchiladas, without beans, cheese (no meat)                                                                                                                         | H                                 | 6                         |
| 52202060                 | Cornbread, made from home recipe                                            | cornbread, prepared from recipe                                                                                                                                     | H                                 | 7                         |
| 55101000                 | Pancakes, plain                                                             | pancake, plain or buttermilk, unknown type                                                                                                                          | H                                 | 6                         |
| 92101920                 | Blended coffee beverage, made with regular coffee, milk, and ice, sweetened | frappuccino, unknown type, regular                                                                                                                                  | H                                 | 7                         |
| 58106725                 | Pizza with meat and vegetables, regular crust                               | pizza, from homemade recipe or restaurant, with one meat topping (sausage, pepperoni or hamburger), with vegetables, without extra cheese, thick crust or deep dish | H                                 | 6                         |
| Low-Confidence Examples  |                                                                             |                                                                                                                                                                     |                                   |                           |
| 81302070                 | Pesto sauce                                                                 | pesto sauce, unknown if commercial or homemade                                                                                                                      | H                                 | 4                         |
| 58100300                 | Burrito with beans and rice, meatless                                       | Taco Bell, lunch and dinner orders, burritos, black bean                                                                                                            | L                                 | 6                         |
| 14502040                 | Imitation cheese                                                            | American cheese, process                                                                                                                                            | L                                 | 3                         |
| 58107100                 | Pizza, no cheese, thick crust                                               | pizza, crust, white, thick                                                                                                                                          | M                                 | 2                         |
| 95120010                 | Nutritional drink or meal replacement, high protein, ready-to-drink, NFS    | special formulated products, drinks, meal replacement drink, unknown if regular or low calorie                                                                      | M                                 | 6                         |

<sup>1</sup>A match was considered “high confidence” if at least five of the individual nutrients used to evaluate the match were rated as “high”, and if the food description confidence level was rated as “high”. The nutrients and rating cut-offs are in Table S2. The food description confidence level was based on the manual lookup team’s assessment of how similar the prompts were between the ASA24 and NDSR systems and how similar the output food descriptions were.

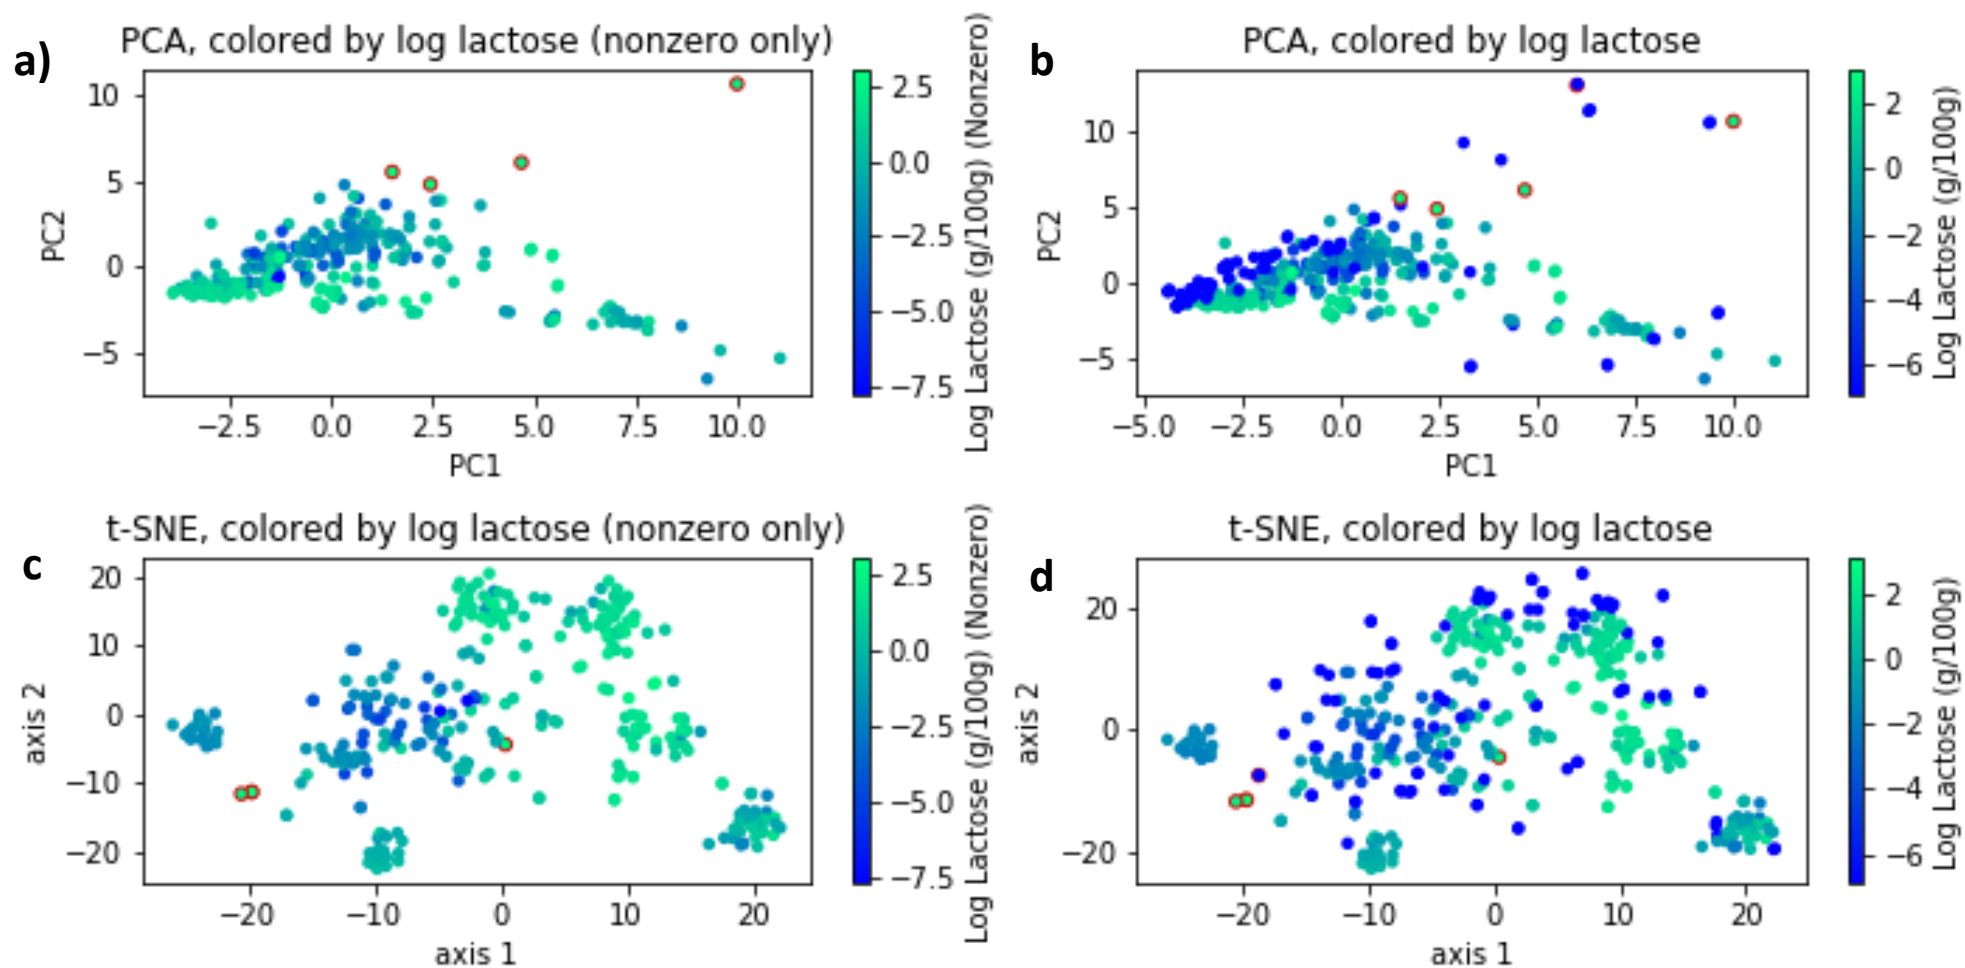

**Figure S3.** a) Principal Component Analysis (PCA) scores plot of the training foods with  $> 0$  g of lactose, b) PCA scores plot of all training foods, c) t-distributed stochastic neighbor embedding (t-SNE) plots of the training foods with  $> 0$  g of lactose, and d) t-SNE plots of all the training foods. Markers outlined in red indicate outliers as determined by *scikit-learn's IsolationForest*. The 62 nutrients and ASA24 year were used as input. A value of 0.001 was added to all lactose values to allow for log transformation.

**Table S4.** The ASA24 FoodCode, Food Description, and ASA24 year for the five foods removed as outliers<sup>1</sup>

| <b>FoodCode</b> | <b>Food_Description</b>                                              | <b>ASA24 Year</b> |
|-----------------|----------------------------------------------------------------------|-------------------|
| 11830800        | Instant breakfast, powder, not reconstituted                         | 2014              |
| 41430310        | Protein diet powder with soy and casein                              | 2014              |
| 43102110        | Sunflower seeds, hulled, roasted, without salt                       | 2014              |
| 95201000        | Carnation Instant Breakfast, nutritional drink mix, regular, powder  | 2016              |
| 95220010        | Nutritional drink mix or meal replacement, high protein, powder, NFS | 2016              |

<sup>1</sup>outliers were determined by *scikit-learn*'s *IsolationForest*.



**Table S5.** Performance metrics of the naïve baseline machine learning models

| <b>Performance Metric</b> | <b>Mean</b> | <b>Median</b> | <b>Median Non-zero</b> | <b>Perfect Classifier + Mean Regressor</b> |
|---------------------------|-------------|---------------|------------------------|--------------------------------------------|
| <b>R<sup>2</sup></b>      | -0.02       | -0.32         | -0.08                  | 0.13                                       |
| <b>SRC</b>                | 0           | 0             | 0                      | 0.73                                       |
| <b>PCC</b>                | 0           | 0             | 0                      | 0.41                                       |
| <b>MAE</b>                | 1.94        | 1.68          | 1.77                   | 1.53                                       |

Spearman's rank correlation coefficient (SRC); Pearson's correlation coefficient (PCC); mean absolute error (MAE)

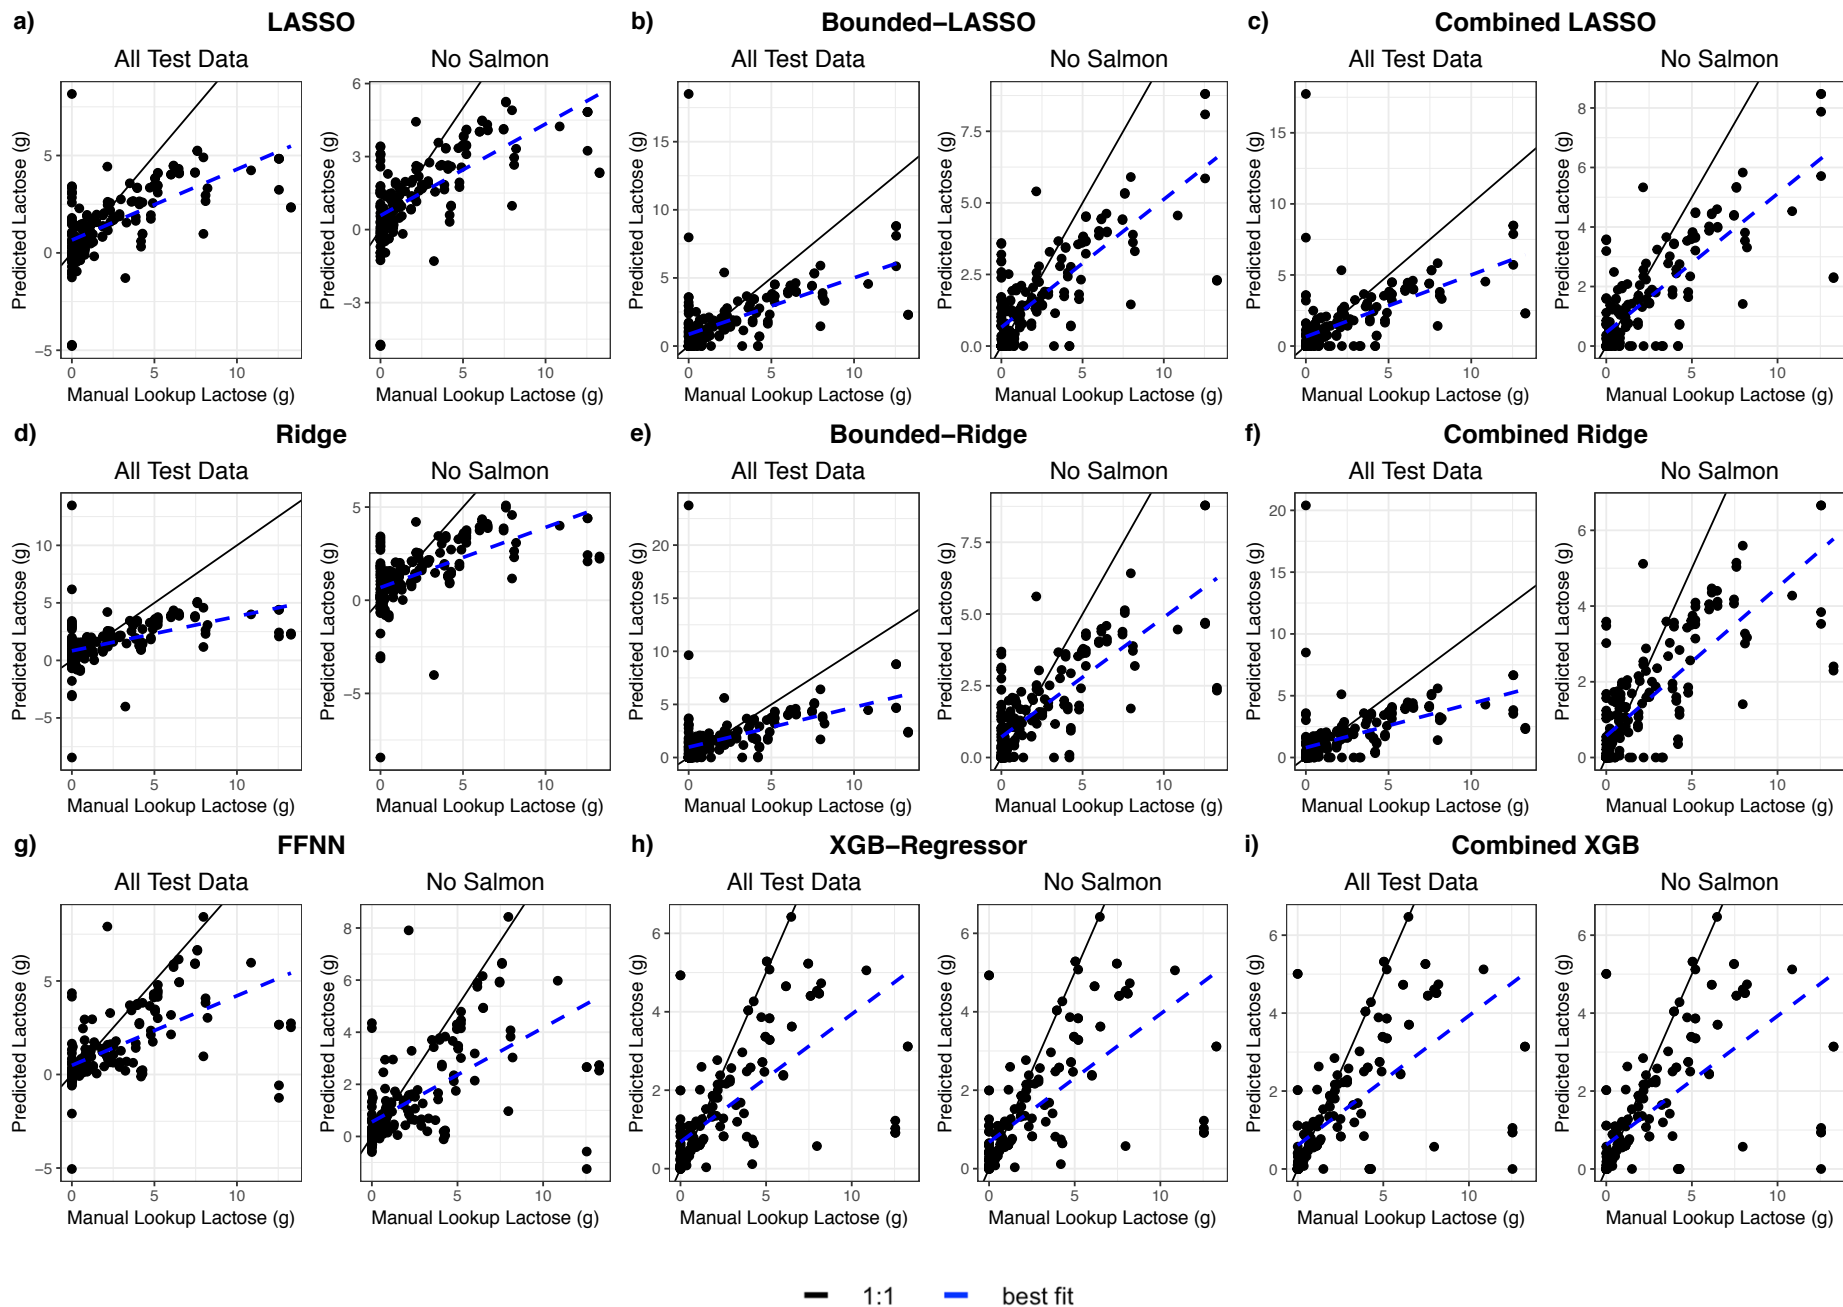

**Figure S4.** Plots of the machine learning test results comparing predicted lactose to the manual lookup lactose value with (left panels) and without (right panels) “Salmon, raw” (ASA24 FoodCode 26137100) for the a) LASSO, b) Bounded-LASSO, c) Combined LASSO, d) Ridge, e) Bounded-Ridge, f) Combined Ridge, g) Feed Forward Neural Network (FFNN), h) XGB-Regressor, and i) Combined XGB models.

**Table S6.** Evaluation metrics for the machine learning models for the “high confidence”<sup>1</sup> test foods (n = 152)

|                     | <b>LASSO</b> | <b>Bounded-LASSO</b> | <b>Combined LASSO</b> | <b>Ridge</b> | <b>Bounded-Ridge</b> | <b>Combined Ridge</b> | <b>FFNN</b> | <b>XGB-Regressor</b> | <b>Combined XGB</b> |
|---------------------|--------------|----------------------|-----------------------|--------------|----------------------|-----------------------|-------------|----------------------|---------------------|
| R <sup>2</sup>      | 0.40         | 0.47                 | 0.49                  | 0.40         | 0.47                 | 0.48                  | 0.52        | <i>0.53</i>          | <i>0.53</i>         |
| SRC                 | 0.68         | 0.68                 | 0.77                  | 0.68         | 0.69                 | 0.78                  | 0.72        | 0.77                 | <i>0.78</i>         |
| PCC                 | 0.68         | 0.73                 | 0.77                  | 0.68         | 0.73                 | 0.77                  | 0.77        | <i>0.79</i>          | 0.78                |
| MAE                 | 1.31         | 1.15                 | 1.07                  | 1.32         | 1.16                 | 1.09                  | 1.02        | 0.96                 | <i>0.92</i>         |
| Classifier Accuracy | NA           | NA                   | 0.89                  | NA           | NA                   | 0.89                  | NA          | NA                   | <i>0.92</i>         |

<sup>1</sup>A “high confidence” food has a “high” text matching rating and at least five of the seven individual nutrients (Total kcal, Total Protein, Total Carbohydrate, Calcium, Phosphorous, or Sodium) were in high confidence between the ASA24 query food and the NDSR match from the manual lookup process.

SRC: Spearman Rank Coefficient; PCC: Pearson’s Correlation Coefficient; MAE: Mean Absolute Error

Italicized values indicate the highest R<sup>2</sup>, SRC, PCC, and Classifier Accuracy, and the lowest MAE.

Table S7 is supplied as a separate file.

### LASSO-weighted Nutrient-Only Matching

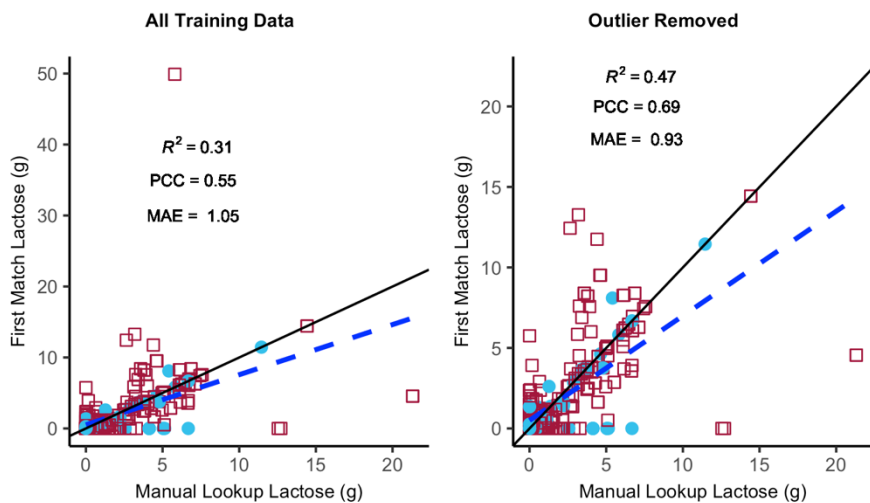

**Fig S5.** Plots of the database matching training data results with and without outlier foods for the a) LASSO-weighted Nutrient-Only matching, b) LASSO-weighted Nutrient + Text matching, and c) Ridge-weighted Nutrient + Text Matching. Pearson's correlation coefficient (PCC); Mean absolute error (MAE).

### LASSO-weighted Nutrient + Text Matching

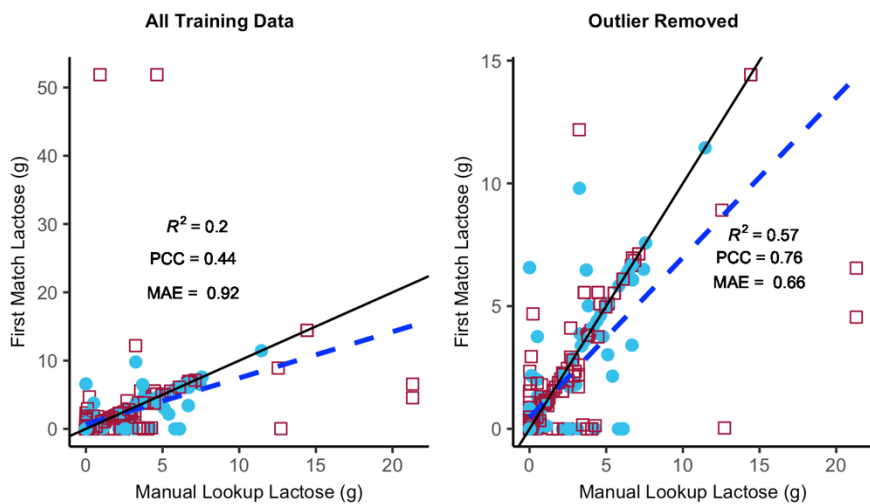

### Ridge-weighted Nutrient + Text Matching

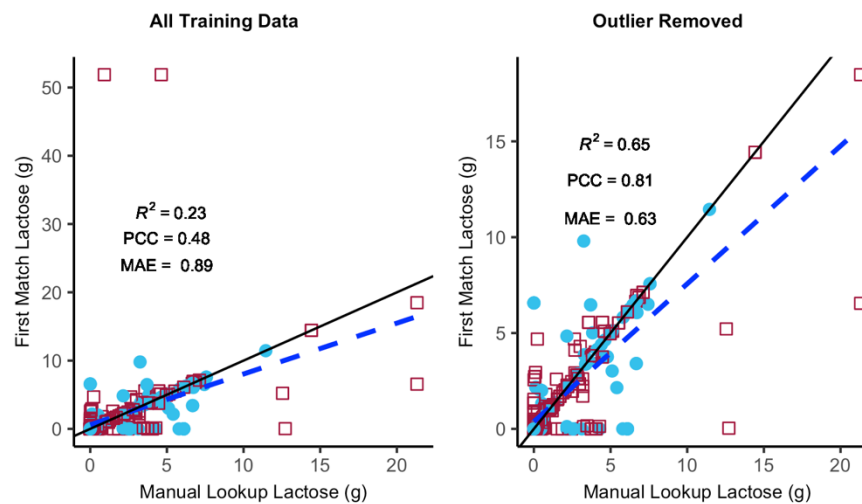

NCC Food Type   ● Core   □ Non-Core  
 — 1:1   — best fit

**Table S8.** Evaluation parameters comparing the lactose from the manual lookup and the database-matching results for “high confidence” foods

| Matching Algorithm | Weighting      | Training (n = 339) |                  |                |                | Test (n=152)   |             |             |             | All Data (n = 491) |                |                |                       |
|--------------------|----------------|--------------------|------------------|----------------|----------------|----------------|-------------|-------------|-------------|--------------------|----------------|----------------|-----------------------|
|                    |                | R <sup>2</sup>     | PCC              | MAE            | Variation      | R <sup>2</sup> | PCC         | MAE         | Variation   | R <sup>2</sup>     | PCC            | MAE            | Variation             |
| Nutrient-Only      | Unweighted     | 0.78               | 0.88             | <i>0.53</i>    | <i>0.35</i>    | 0.46           | 0.68        | <i>0.97</i> | <i>0.50</i> | 0.66               | 0.81           | <i>0.67</i>    | <i>0.38</i>           |
|                    | LASSO-weighted | 0.42<br>(0.67)     | 0.65<br>(0.82)   | 0.90<br>(0.77) | 0.65<br>(0.65) | 0.33           | 0.58        | 1.20        | 0.68        | 0.37<br>(0.54)     | 0.60<br>(0.74) | 1.00<br>(0.91) | 0.67<br>(0.67)        |
|                    | Ridge-weighted | <i>0.80</i>        | <i>0.89</i>      | 0.56           | 0.44           | <i>0.51</i>    | <i>0.71</i> | 1.02        | 0.53        | <i>0.69</i>        | <i>0.83</i>    | 0.70           | 0.48                  |
| Nutrient + Text    | Unweighted     | <i>0.85</i>        | <i>0.92</i>      | <i>0.38</i>    | <i>0.48</i>    | 0.64           | 0.80        | 0.68        | 0.53        | <i>0.77</i>        | <i>0.88</i>    | <i>0.46</i>    | 0.51                  |
|                    | LASSO-weighted | 0.24<br>(0.77)     | 0.49<br>(0.88)   | 0.77<br>(0.48) | 0.52<br>(0.52) | 0.63           | 0.80        | 0.69        | 0.56        | 0.27<br>(0.70)     | 0.52<br>(0.84) | 0.76<br>(0.56) | 0.54<br>(0.54)        |
|                    | Ridge-weighted | 0.24<br>(0.76)     | 0.492<br>(0.872) | 0.77<br>(0.49) | 0.50<br>(0.50) | <i>0.68</i>    | <i>0.83</i> | <i>0.59</i> | <i>0.52</i> | 0.28<br>(0.72)     | 0.53<br>(0.84) | 0.73<br>(0.64) | <i>0.50</i><br>(0.50) |

A “high confidence” food has a “high” text matching rating and at least five of the seven individual nutrients (Total Kcal, Total Protein, Total Carbohydrate, Calcium, Phosphorous, or Sodium) were in high confidence between the ASA24 query food and the NDSR match from the manual lookup process. The R<sup>2</sup> and MAE are comparisons of the g of lactose between the manual lookup and the first match from the matching algorithm. The variation represents the median coefficient of variation in g of lactose among the top 5 matches returned by the matching algorithm. Italicized values indicate the highest R<sup>2</sup>, lowest MAE, and lowest variation for the Nutrient-Only and Nutrient + Text algorithms for a given dataset.

Table S9 is supplied as a separate file

**Table S10.** The number of training and test foods correctly matched with the known FNDDS FoodLink the Nutrient-Only and Nutrient + Text database matching.

| Dataset  | Weighting  | Total n Foodlinks | Nutrient Only  |                    | Nutrient + Text |                    |
|----------|------------|-------------------|----------------|--------------------|-----------------|--------------------|
|          |            |                   | n as 1st match | n in top 5 matches | n as 1st match  | n in top 5 matches |
| Training | Unweighted | 33                | 13 (39.4%)     | 23 (69.7%)         | 19 (57.6%)      | 30 (90.9%)         |
|          | LASSO      |                   | 9 (27.3%)      | 16 (48.5%)         | 18 (54.5%)      | 28 (84.8%)         |
|          | Ridge      |                   | 9 (27.3%)      | 19 (57.6%)         | 18 (54.5%)      | 28 (84.8%)         |
| Test     | Unweighted | 9                 | 3 (33.3%)      | 4 (44.4%)          | 5 (55.6%)       | 6 (66.7%)          |
|          | LASSO      |                   | 1 (11.1%)      | 4 (44.4%)          | 5 (55.6%)       | 6 (66.7%)          |
|          | Ridge      |                   | 2 (22.2%)      | 4 (44.4%)          | 5 (55.6%)       | 6 (66.7%)          |



**Table S11.** The number of lactose free (0 g of lactose) ASA24-reported foods and the number of lactose-free Nutrient-Only and Nutrient + Text first matches and the number where the first five matches were all lactose free.

| Dataset  | Weighting  | 0-lactose manual matches | Nutrient Only            | Nutrient + Text          |
|----------|------------|--------------------------|--------------------------|--------------------------|
|          |            |                          | first match is 0-lactose | first match is 0-lactose |
| Training | Unweighted | 87                       | 65 (74.7%)               | 70 (80.5%)               |
|          | LASSO      |                          | 61 (70.1%)               | 68 (78.2%)               |
|          | Ridge      |                          | 65 (74.7%)               | 69 (79.3%)               |
| Test     | Unweighted | 44                       | 37 (84.1%)               | 38 (86.4%)               |
|          | LASSO      |                          | 30 (68.2%)               | 37 (84.1%)               |
|          | Ridge      |                          | 38 (86.4%)               | 38 (86.4%)               |
